# Supplementary material for: A Potential Nutraceutical Candidate Lactucin Inhibits Adipogenesis through Downregulation of JAK2/STAT3 Signaling Pathway-Mediated Mitotic Clonal Expansion
Source: PubMed Central journal article supplement (PMC7072480; doi:10.3390/cells9020331), 2020-01-31
Supplement: cells-09-00331-s001.pdf [file cells-09-00331-s001.pdf]

1 Supplemental Figure 1

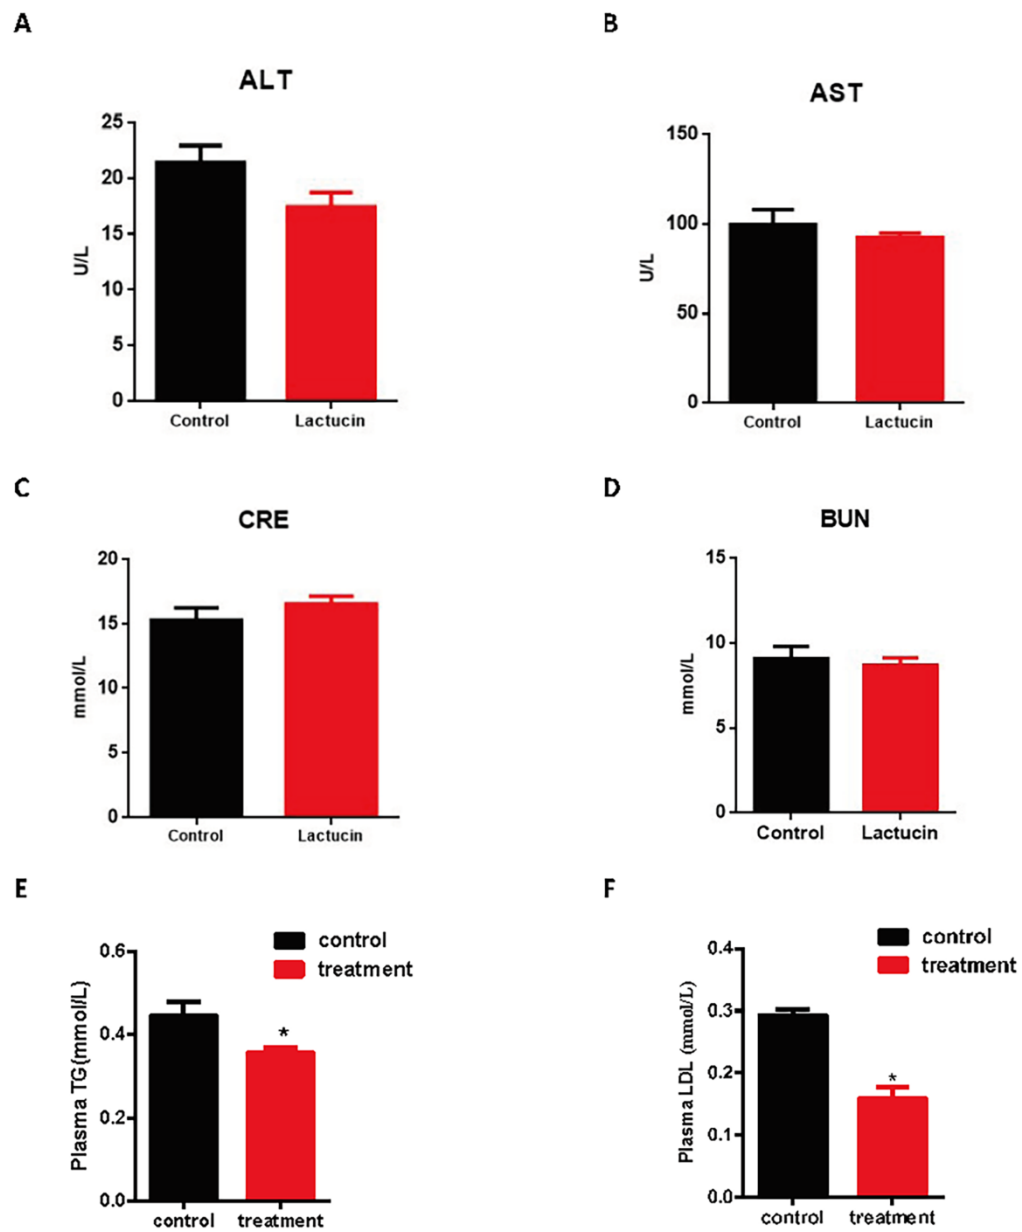

2  
3  
4  
5  
6  
7  
8

**Supplemental Figure 1.** (A-B) Levels of plasma alanine aminotransferase (ALT) and aspartate aminotransferase (AST) (n=6). (C-D) Levels of plasma urea nitrogen (BUN) and creatinine (CREA) (n=6). (E-F) Levels of plasma TG and LDL. Values are mean  $\pm$  S.E.M. \*  $p < 0.05$ , \*\*  $p < 0.01$ , \*\*\* $p < 0.001$ .

9 Supplemental Figure 2

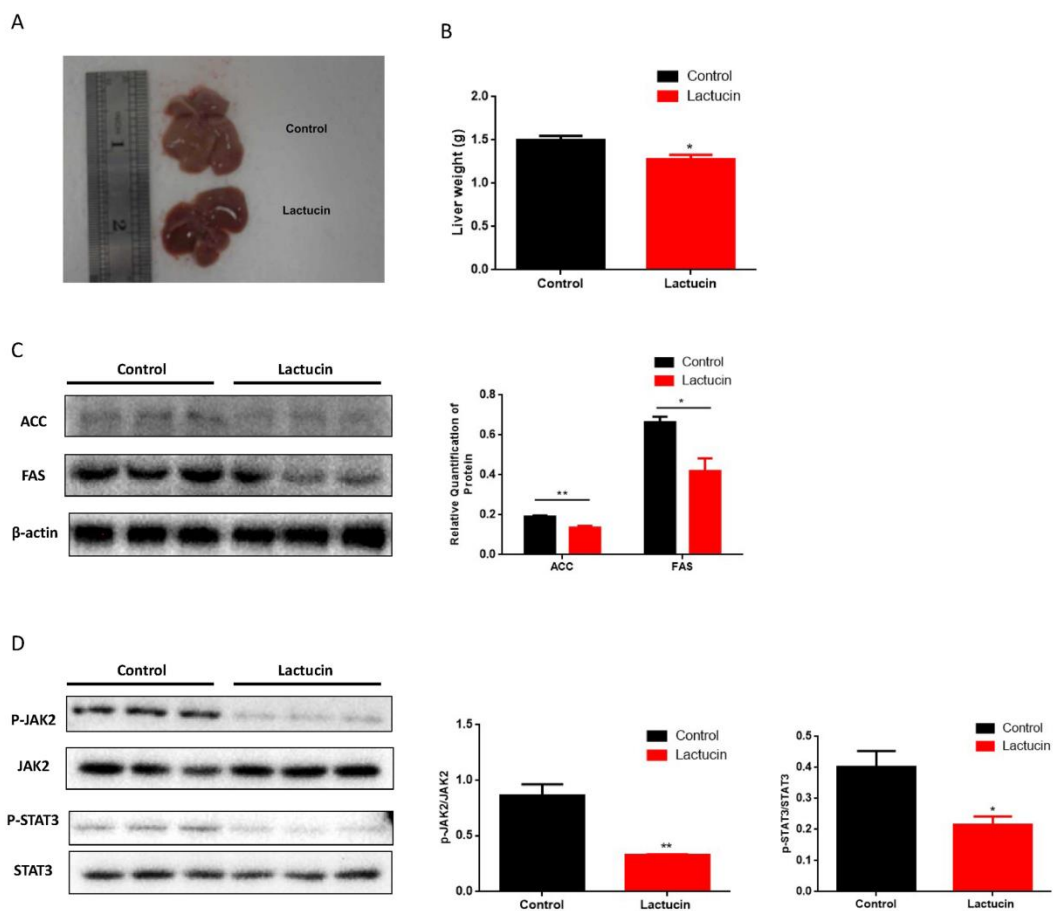

10  
 11 Supplemental Figure 2. (A) Morphology of the liver. (B) The weight of liver (n=7). (C) The  
 12 immunoblot analysis of ACC and FAS in liver (n=3). (D) The immunoblot analysis of JAK2/STAT3  
 13 signaling pathway in adipose tissue of mice treated with vehicle or lactucin (n=3). Values are mean  
 14 ± S.E.M. \* p < 0.05, \*\* p < 0.01, \*\*\* p < 0.001.

15

16

## 17 Supplemental Tables

## 18 Supplemental Table 1. Primers used in real-time quantitative PCR.

| Target gene                                                  | Forward (5'-3')          | Reverse (5'-3')            |
|--------------------------------------------------------------|--------------------------|----------------------------|
| <i>β-Actin</i>                                               | GTCCCTGACCCTCCCAAAG      | GCTGCCTCAACACCTCAACCC      |
| <i>CCAAT Enhancer Binding Protein β (C/EBP β)</i>            | AAGCTGAGCGACGAGTACAAGA   | GTCAGCTCCAGCACCTTGTG       |
| <i>Peroxisome proliferator activated receptor γ (PPAR γ)</i> | CCAAGAATACCAAAGTGCGATCA  | CCCACAGACTCGGCACTCAAT      |
| <i>CCAAT Enhancer Binding Protein α (C/EBP α)</i>            | TGGACAAGAACAGCAACGAG     | TCACTGGTCAACTCCAGCAC       |
| <i>Diacylglycerol O-Acyltransferase 1 (DGAT 1)</i>           | CCGTGTTTGCTCTGGCATC      | TGACCTTCTTCCCTGTAGAG       |
| <i>Diacylglycerol O-Acyltransferase 2 (DGAT 2)</i>           | CCTTCCTGGTGCTAGGAGTG     | CCAGTCAAATGCCAGCCA         |
| <i>adipocyte protein 2 (aP2)</i>                             | AAGAAGTGGGAGTGGGCTTTG    | CTCTTCACCTTCCTGTCGTCTG     |
| <i>Glucose transporter 4 (Glut4)</i>                         | CTGATTCTGCTGCCCTTCTGTCCT | GACATTGGACGCTCTCTCTCCAACTT |
| <i>CD36 Molecule (Cd36)</i>                                  | CCTTAAAGGAATCCCCGTGT     | TGCATTTGCCAATGTCTAGC       |
| <i>p27</i>                                                   | GGGCTCGTCTTTTCGGGGTGTTT  | GAGCGGGAGGGCGGAGAGGAG      |
| <i>p21</i>                                                   | AGTGTGCCGTTGTCTCTTCG     | ACACCAGAGTGCAAGACAGC       |
| <i>Cyclin-dependent kinase 2 (CDK 2)</i>                     | AGGCATGAGGAATCTGGGAG     | GAGGTGGACGTCAGAGGAAA       |

19

20

21 **Supplemental Table 2.** Anti-body used in western-blot and immunofluorescence.

| Antibody                                                                              | From                                 | Dilution (WB/IF) |
|---------------------------------------------------------------------------------------|--------------------------------------|------------------|
| $\beta$ -Actin                                                                        | Cell signaling Technology (4970S)    | 1:5000           |
| CCAAT Enhancer Binding Protein $\beta$ (C/EBP $\beta$ )                               | Santa Cruz Biotechnology (sc-7962)   | 1:1000/1:250     |
| CCAAT Enhancer Binding Protein $\alpha$ (C/EBP $\alpha$ )                             | Santa Cruz Biotechnology (sc-365318) | 1:1000           |
| CD36 Molecule (Cd36)                                                                  | Cell signaling Technology (14347S)   | 1:1000           |
| Peroxisome proliferator-activated receptor gamma coactivator 1-alpha (PGC1 $\alpha$ ) | Cell signaling Technology (2179S)    | 1:1000           |
| Peroxisome proliferator activated receptor $\gamma$ (PPAR $\gamma$ )                  | Cell signaling Technology (2430S)    | 1:2000           |
| Fatty acid binding protein 4 (FABP4)                                                  | Cell signaling Technology (2120S)    | 1:1000           |
| Acetyl-CoA carboxylase (ACC)                                                          | Cell signaling Technology (3662)     | 1:1000           |
| Fatty acid synthase (FAS)                                                             | Cell signaling Technology (3180)     | 1:1000           |
| Cyclin-dependent kinase 2 (CDK 2)                                                     | Santa Cruz Biotechnology (sc-6268)   | 1:1000           |
| p27                                                                                   | Santa Cruz Biotechnology (sc-1641)   | 1:1000           |
| p21                                                                                   | Santa Cruz Biotechnology (sc-6246)   | 1:1000           |
| Glucose transporter 4 (Glut4)                                                         | Abcam (ab654)                        | 1:2000/1:250     |
| Janus kinase 2 (JAK 2)                                                                | Wanleibio (WL02188)                  | 1:500            |

|                                                               |                     |        |
|---------------------------------------------------------------|---------------------|--------|
| Phospho JAK 2 (Tyr1007/1008)                                  | Wanleibio (WL02997) | 1:500  |
| Signal transducer and activator of transcription 3<br>(STAT3) | Wanleibio (WL01836) | 1:500  |
| Phospho-Stat3 (Tyr705)                                        | Wanleibio (WLP2412) | 1:500  |
| Goat anti-rabbit (FITC)                                       | Abbkine A23420      | 1:1000 |
| Goat anti-mouse (FITC)                                        | Abbkine A23210      | 1:1000 |

---
